# Supplementary material for: Impact of insertion sequences on convergent evolution of Shigella species
Source: PLOS journal article supplement (doi:10.1371/journal.pgen.1008931), 2020-07-09

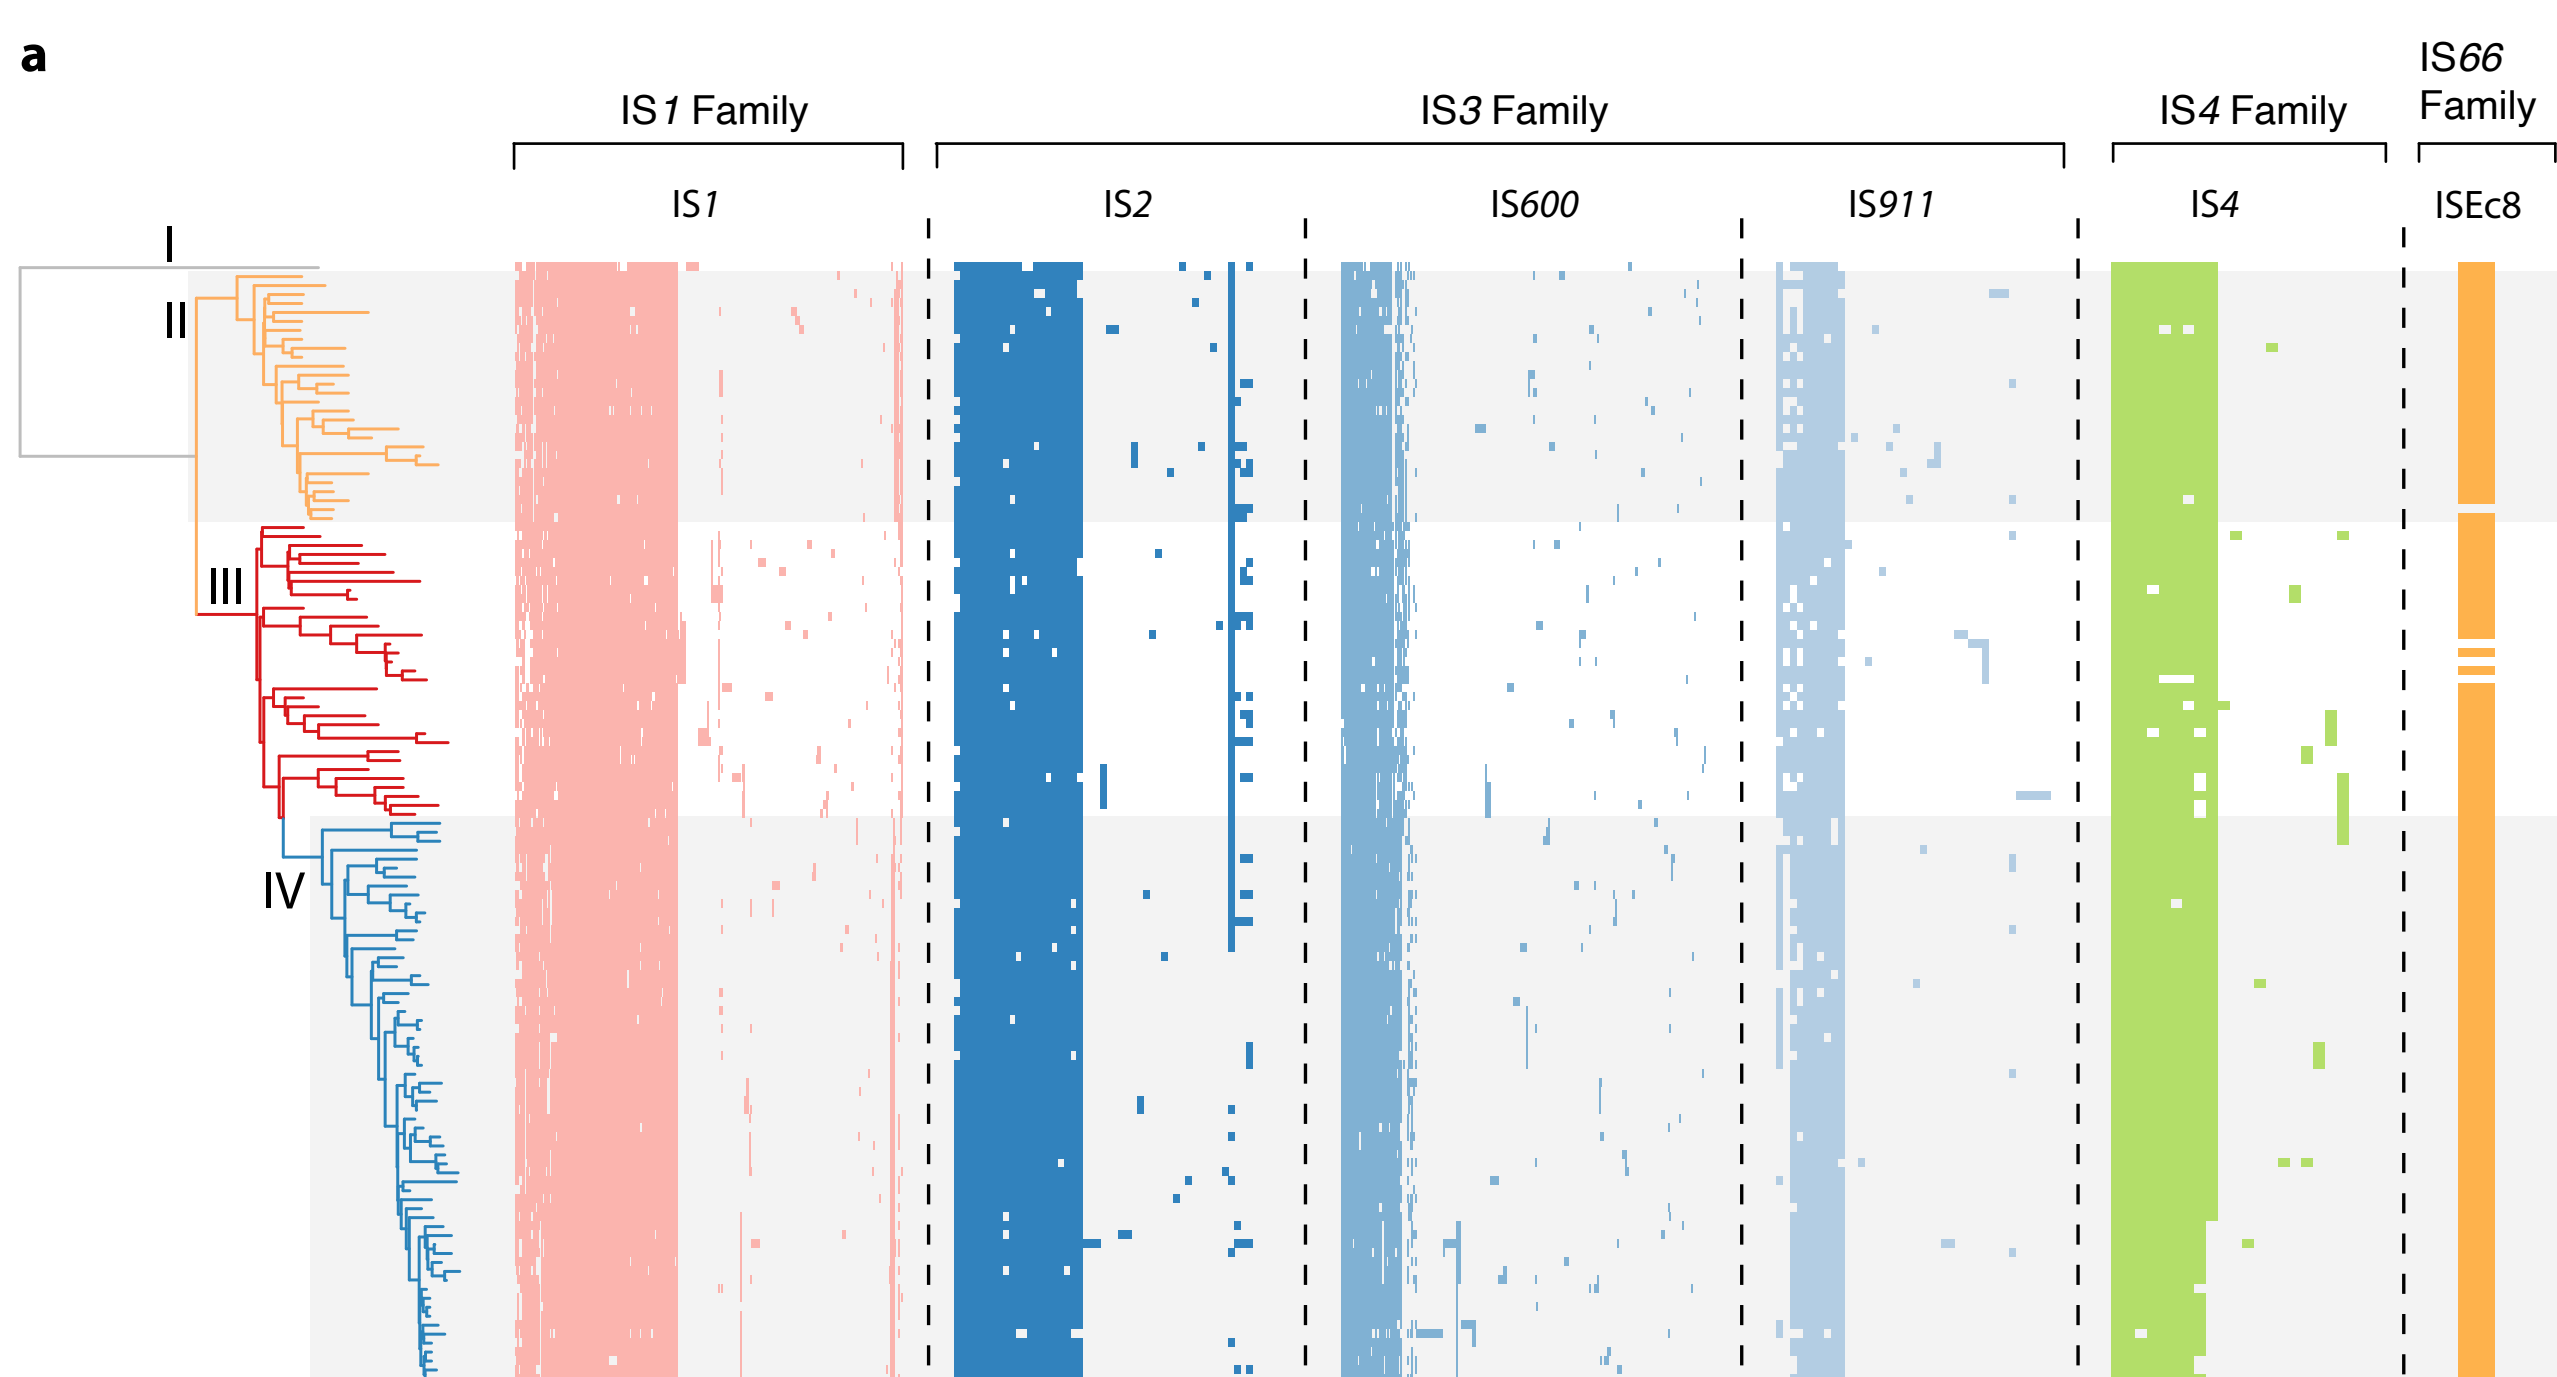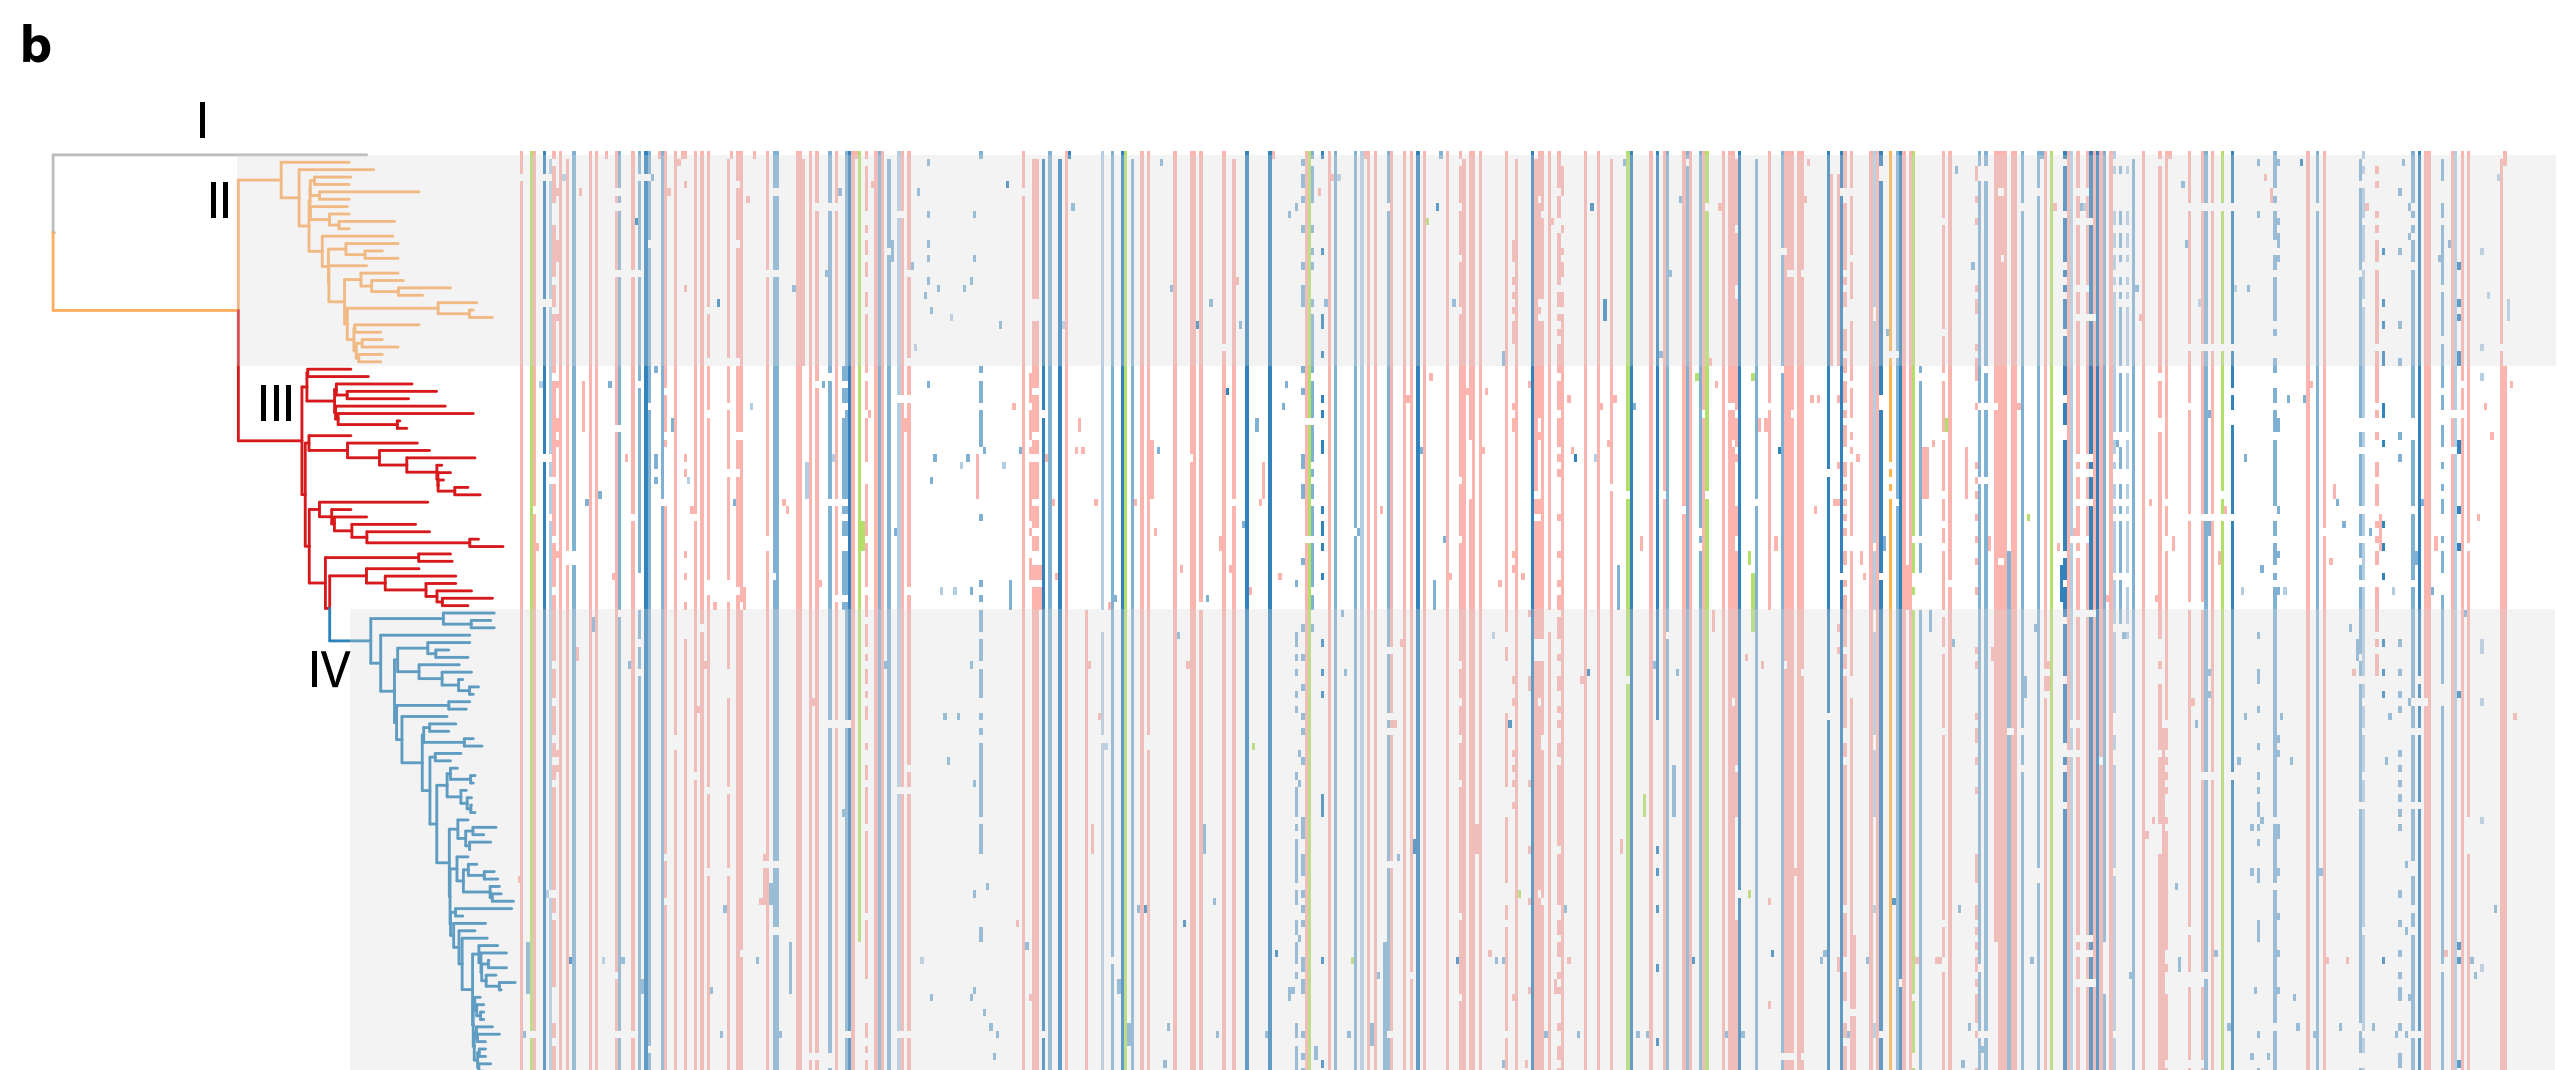

Supplement: S1 (10.1371/journal.pgen.1008931.s001) [file journal.pgen.1008931.s001]
