# Supplementary material for: Impact of insertion sequences on convergent evolution of Shigella species
Source: PLoS Genet. 2020 Jul 9;16(7):e1008931. doi: 10.1371/journal.pgen.1008931 (PMC7373316; doi:10.1371/journal.pgen.1008931)
Supplement: S7 Table — (XLSX) [file pgen.1008931.s030.xlsx]

## Sheet: TableS4_ecoliPATRIC_IScounts
NCBI Accession	PATRIC ID	Genome Name	IS1	IS2	IS4	IS600	IS911	other	total
NJGS01000000	1.07803e+06	Escherichia coli O45:H2 strain FWSEC0003	0	0	0	0	0	13	13
CP006636,CP006637,CP006638,CP006639,CP006640,CP006641,CP006642	1.35842e+06	Escherichia coli PCN061	2	1	0	0	0	15	18
CP019953,CP019954,CP019955,CP019956	1.39285e+06	Escherichia coli M8	0	1	0	0	1	12	14
CP024223,CP024224,CP024225,CP024226,CP024227	1.4467e+06	Escherichia coli O169:H41 strain 2014EL-1345-2	0	0	0	0	0	9	9
CP024243,CP024244	2.04878e+06	Escherichia coli O128:H27 strain 90-9281	1	1	0	1	0	13	16
CP024239,CP024238	2.04878e+06	Escherichia coli O15:H11 strain 90-9272	3	1	0	1	0	13	18
CP024289,CP024290,CP024291,CP024292	2.04878e+06	Escherichia coli O178:H19 strain 2012C-4431	0	0	0	0	0	9	9
CP024252,CP024249,CP024250,CP024251,CP024253	2.04878e+06	Escherichia coli O182:H21 strain D181	1	0	0	1	0	10	12
CP041300,CP041299	2.59207e+06	Escherichia coli O1:H42 strain CLSC36	1	1	1	0	0	9	12
CP020543	498388	Escherichia coli C strain C	1	0	0	0	0	10	11
CP015228,CP012500	562.113	Escherichia coli strain 09-00049	0	0	1	0	0	12	13
CP013031	562.115	Escherichia coli strain H1827/12	1	0	1	0	1	10	13
CP010119,CP010120	562.137	Escherichia coli strain C3	1	1	0	0	0	13	15
CP010122,CP010123,CP010124	562.137	Escherichia coli strain C5	0	0	0	0	0	11	11
CP010177	562.138	Escherichia coli strain H14	0	1	1	0	0	6	8
CP010235	562.138	Escherichia coli strain S40	0	0	0	0	0	6	6
CP010186,CP010187,CP010188,CP010189,CP010190	562.138	Escherichia coli strain M6	0	0	0	0	0	10	10
CP010191,CP010192,CP010193,CP010194,CP010195	562.138	Escherichia coli strain M8	0	0	0	0	0	4	4
CP010231,CP010232,CP010233,CP010234	562.138	Escherichia coli strain S30	2	1	0	0	0	14	17
CP019213,CP019215,CP019214,CP019216	562.151	Escherichia coli strain WCHEC1613	3	1	0	0	0	18	22
CP019903,CP019908,CP019904,CP019907,CP019909,CP019910,CP019906,CP019905	562.152	Escherichia coli strain MDR_56	2	1	1	0	0	14	18
CP019005,CP019002,CP019003,CP019004,CP019001	562.152	Escherichia coli strain Ecol_AZ155	2	1	0	0	0	15	18
CP020058,CP020059,CP020060	562.163	Escherichia coli strain AR_0061	1	1	0	0	0	13	15
CP020107	562.163	Escherichia coli strain 13E0767	1	0	0	0	0	11	12
CP021175,CP021176,CP021177	562.165	Escherichia coli strain 5CRE51	2	1	0	1	0	20	24
CP021207,CP021208,CP021209,CP021210	562.165	Escherichia coli strain strain Z247	1	0	0	0	0	14	15
LT838196,LT838197,LT838198,LT838199	562.165	Escherichia coli strain WI1 isolate	1	1	0	0	0	14	16
CP023349,CP023350,CP023351,CP023352	562.192	Escherichia coli strain ETEC-2264	1	0	0	0	0	11	12
CP023386,CP023387	562.192	Escherichia coli strain 1190	0	0	1	1	1	8	11
CP023388,CP023389	562.192	Escherichia coli strain 1105	0	0	0	0	0	13	13
CP023353,CP023354,CP023355,CP023356	562.192	Escherichia coli strain 746	0	0	0	0	0	15	15
CP022393	562.196	Escherichia coli strain E62	0	0	1	0	0	6	7
CP021691,CP021692,CP021693	562.196	Escherichia coli strain AR_0151	1	0	0	1	0	16	18
CP021535,CP021536,CP021537,CP021538	562.196	Escherichia coli strain AR_0149	1	1	0	0	0	18	20
AP017617,AP017618,AP017619	562.205	Escherichia coli strain MRY15-117	2	1	1	0	0	14	18
CP024661,CP024662,CP024663,CP024664,CP024665,CP024666	562.224	Escherichia coli strain 90-9269	3	1	0	1	0	12	17
CP025048	562.254	Escherichia coli strain SC516	3	1	1	0	0	12	17
CP025747	562.282	Escherichia coli strain ML35	2	1	0	0	0	15	18
CP026202,CP026208,CP026203,CP026206,CP026207,CP026204,CP026205,CP026209	562.282	Escherichia coli strain ECONIH5	5	1	1	0	0	26	33
CP014111,CP014110,CP014112,CP014109	562.284	Escherichia coli strain FDAARGOS_144	0	0	0	0	0	10	10
CP019455,CP019456	562.284	Escherichia coli strain FHI_NMBU_03	0	0	0	0	0	4	4
CP020025	562.284	Escherichia coli strain WB61	0	0	1	0	0	5	6
CP027323,CP027324	562.287	Escherichia coli strain 2013C-3033	0	1	0	1	0	10	12
CP027328,CP027329,CP027330	562.287	Escherichia coli strain 2014C-3741	0	1	0	0	0	14	15
CP029242,CP029243,CP029244,CP029245	562.29	Escherichia coli strain ECCRA-119	2	0	0	0	0	18	20
CP019961	562.29	Escherichia coli strain HKUOPY1	0	0	0	0	0	11	11
CP028192,CP028195,CP028193,CP028194	562.29	Escherichia coli strain CFSAN018748	0	1	0	0	0	11	12
CP027459,CP027460	562.291	Escherichia coli strain 90-3040	0	1	0	1	0	7	9
CP027355,CP027356,CP027357,CP027358	562.291	Escherichia coli strain 2013C-4991	1	1	0	0	0	17	19
CP027351,CP027350	562.291	Escherichia coli strain 2014C-3655	0	1	0	1	1	8	11
CP027597,CP027598	562.291	Escherichia coli strain 86-3153	0	0	0	0	0	12	12
CP027591,CP027589,CP027590,CP027592	562.291	Escherichia coli strain 2014C-3011	0	1	0	0	0	12	13
CP027452,CP027453	562.291	Escherichia coli strain 2014C-3338	0	0	1	0	0	3	4
CP027368,CP027369,CP027370	562.291	Escherichia coli strain 2014C-3307	0	0	0	0	0	6	6
CP030768,CP030770,CP030769	562.31	Escherichia coli strain 2017C-4173W12	2	1	1	0	1	17	22
CP031157	562.335	Escherichia coli strain SYNB1618	1	1	0	0	0	14	16
CP031833	562.34	Escherichia coli strain 2452	3	1	1	0	1	12	18
CP032936,CP032937,CP032943,CP032942,CP032941,CP032940,CP032939,CP032938	562.362	Escherichia coli strain CHL5009T	1	0	0	0	0	19	20
CP032986,CP032988,CP032987	562.362	Escherichia coli strain BE2-5	1	0	0	0	0	9	10
CP032989,CP032991,CP032990	562.362	Escherichia coli strain W2-5	1	0	0	0	0	14	15
CP033635,CP033632,CP033633,CP033634,CP033636	562.369	Escherichia coli strain ECCNB12-2	2	1	1	0	0	16	20
CP025920,CP025921,CP025922	562.391	Escherichia coli strain 103605	0	0	0	0	0	12	12
CP025881,CP025883,CP025882,CP025885,CP025884	562.391	Escherichia coli strain 503440	1	1	0	1	0	12	15
CP034843,CP034844,CP034845,CP034846,CP034847,CP034848,CP034849,CP034850,CP034851	562.395	Escherichia coli strain L103-2	2	1	0	0	0	13	16
LR134078	562.395	Escherichia coli strain NCTC9085	0	1	0	0	0	15	16
LR134081	562.395	Escherichia coli strain NCTC9033	0	0	1	1	1	17	20
LR134222	562.395	Escherichia coli strain NCTC11129	2	1	0	0	0	23	26
LR134225	562.395	Escherichia coli strain NCTC9054	0	1	0	0	0	10	11
LR134315	562.395	Escherichia coli strain NCTC9064	4	0	0	0	1	13	18
CP035354,CP035352,CP035353,CP035355,CP035356,CP035357,CP035358,CP035359	562.454	Escherichia coli strain BR64-DEC	0	1	0	0	0	5	6
CP034399,CP034396,CP034397,CP034400,CP034398	562.454	Escherichia coli strain CRE1	1	1	1	0	0	18	21
CP026641,CP026642,CP026643,CP026644	562.454	Escherichia coli strain FORC_082	3	1	0	1	0	15	20
CP038505,CP038506	562.46	Escherichia coli strain 28Eco12	2	1	0	1	0	19	23
CP039298,CP039299,CP039300,CP039301,CP039302	562.462	Escherichia coli strain PigCaeca_1	3	0	0	0	0	12	15
CP038453,CP038454,CP038455,CP038456,CP038457,CP038458,CP038459	562.467	Escherichia coli strain EC-129	2	1	0	1	0	18	22
LR025101,LR025102,LR025103,LR025104,LR025105	562.482	Escherichia coli strain EC-1639	1	1	1	1	1	11	16
LR536430	562.483	Escherichia coli strain f974b26a-5e81-11e8-bf7f-3c4a9275d6c8	3	1	1	0	0	20	25
LR536431	562.483	Escherichia coli strain f9610206-5e81-11e8-bf7f-3c4a9275d6c8	3	0	0	0	0	19	22
CP019243,CP019244	562.502	Escherichia coli strain Combat2C1	0	0	0	0	0	13	13
CP019259,CP019260,CP019261,CP019262,CP019263,CP019264,CP019265,CP019266	562.502	Escherichia coli strain 13C1065T	3	1	0	0	0	13	17
CP042250,CP042247,CP042248,CP042249	562.506	Escherichia coli strain BCE049	0	0	0	0	0	6	6
CP042470,CP042471	562.506	Escherichia coli strain A50	0	0	0	0	0	15	15
CP042585,CP042586,CP042584,CP042587	562.506	Escherichia coli strain LD91-1	1	0	0	0	0	7	8
CP042638,CP042639,CP042640,CP042641,CP042642,CP042643,CP042644	562.506	Escherichia coli strain NCYU-24-74 strain not collected	1	0	0	0	0	11	12
CP040927,CP040928,CP040929	562.507	Escherichia coli strain YY76-1	3	1	0	0	0	16	20
CP044315	562.516	Escherichia coli strain SJ7	0	0	0	0	0	10	10
CP041448,CP041449,CP041447,CP041446,CP041445,CP041444	562.516	Escherichia coli strain YPE10	2	1	0	0	0	13	16
CP045277,CP045278,CP045279,CP045280,CP045281,CP045282,CP045283,CP045284,CP045285,CP045286	562.525	Escherichia coli strain LAU-OXA	1	1	0	1	0	21	24
CP046009,CP046007,CP046008	562.539	Escherichia coli strain 1919D62	1	1	0	0	0	13	15
CP046259,CP046261,CP046260	562.54	Escherichia coli strain ECO2947	1	0	0	0	0	11	12
CP044293,CP044294	562.54	Escherichia coli strain P276M	4	1	0	0	0	9	14
CU928162	585398	Escherichia coli ED1a	1	0	0	1	0	10	12
CP002729,CP002730,CP002731,CP002732,CP002733	696406	Escherichia coli UMNK88	2	1	0	1	0	16	20
CP033605	83334.3	Escherichia coli O157:H7 strain TR01	1	1	0	0	0	9	11
CP011134,CP011135,CP011136,CP011137,CP011138,CP011139,CP011140,CP011141,CP011142,CP011143	941323	Escherichia coli VR50	1	1	1	0	1	14	18
CP007442	1311757.3	Escherichia coli ACN001
CP010125,CP010126,CP010127,CP010128	562.13749	Escherichia coli strain C8
CP025753,CP025751,CP025752	562.28191	Escherichia coli strain CV839-06
CP010315.1,CP010318.1,CP010317.1,CP010316.1	562.5744	Escherichia coli 789
CP013962	562.8526	Escherichia coli strain SEC470
